# Supplementary material for: One-pot tandem synthesis of 5-ethoxymethylfurfural as a potential biofuel
Source: Royal Society of Chemistry journal article supplement (doi:10.1039/d2re00348a), 2022-10-11
Supplement: d2re00348a1.pdf [file d2re00348a1.pdf]

## **One-pot tandem synthesis of 5-ethoxymethylfurfural as a potential biofuel**

*Gabriel Abranches Dias Castro<sup>a</sup> and Sergio Antonio Fernandes<sup>a,\*</sup>*

<sup>a</sup>Grupo de Química Supramolecular e Biomimética (GQSB), Departamento de Química,  
Universidade Federal de Viçosa, Viçosa, MG 36570-900, Brazil.

\*Corresponding author: Sergio Antonio Fernandes (Tel.: +55-31-3612-6647; E-mail:  
santonio@ufv.br or sefernandes@gmail.com).

## GENERAL TECHNIQUES

Analytical grade commercial solvents and reagents were purchased from Sigma-Aldrich, and used as received. Infrared spectra were recorded as neat using a FT-IR Varian 660 Fourier transform infrared spectrometer. Values are expressed in wavenumbers ( $\text{cm}^{-1}$ ) and recorded in a range of 4000–400  $\text{cm}^{-1}$ . NMR spectra were recorded at 25 °C in  $\text{CDCl}_3$  on a Varian Mercury 300 spectrometer operating at 300 MHz for  $^1\text{H}$  and 75 MHz for  $^{13}\text{C}$ . All chemical shifts are reported in parts per million (ppm) and were measured relative to the solvent in which the sample was analyzed ( $\text{CDCl}_3$   $\delta = 7.26$  for  $^1\text{H}$  NMR and  $\delta = 77.0$  for  $^{13}\text{C}$  NMR). Coupling constants ( $J$ ) are reported in hertz (Hz). The chromatograms were obtained by gas chromatography coupled to a mass spectrometer, using a SHIMADZU GCMS-QP2010C Ultra mass spectrometer and the method with the following specifications: column Ultra Alloy 5, 30 m, DI 0.25 mm; helium carrier gas; injector temperature: 290 °C; the oven temperature was: 40 °C (2.0 min), with a ramp from 30 °C  $\text{min}^{-1}$  to 250 °C (maintained for 1.0 min). The percentage of EMF, HMF e EL yield (%) was calculated based on the calibration curve, using TMB as an internal standard. The conversion of fructose under optimal reaction conditions was determined using a system Thermo Scientific Accela LC liquid chromatograph (refractive index (RI) detector, auto-injector and Accela pump) (Thermo Fischer Scientific, TX, USA).

## EXPERIMENTAL PROCEDURES

### Synthesis of calix[*n*]arenes

#### Synthesis of the *p*-*tert*-butylcalix[4]arene

The synthesis of the *p*-*tert*-butylcalix[4]arene involving the condensation of the *p*-*tert*-butylphenol, formaldehyde solution with a basic medium and under heating, as shown in Scheme 1, following the methodology described by Gutsche et al <sup>1</sup>. The product was obtained as a white solid in 77% yield.

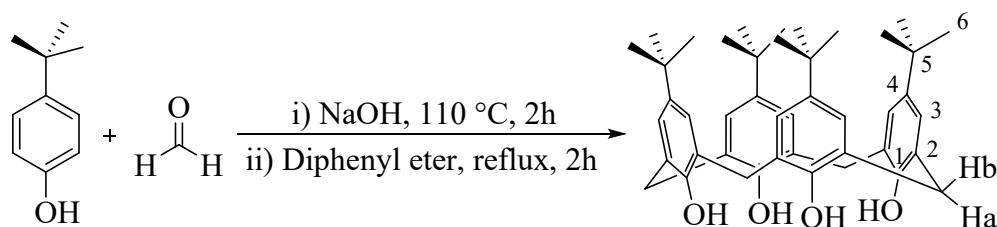

**Scheme 1** Reaction for obtaining the *p*-*tert*-butylcalix[4]arene.

<sup>1</sup>H NMR (300 MHz, CDCl<sub>3</sub>): 1.21 (s, 36H, H-6), 3.48 (d, 4H, *J* = 12.4, CH<sub>2</sub>-Ha), 4.28 (d, 4H, *J* = 12.4, CH<sub>2</sub>-Hb), 7.05 (s, 8H, H-3), 10.34 (s, 4H, OH).

<sup>13</sup>C NMR (75 MHz, CDCl<sub>3</sub>): 31.4 (C-6), 32.7 (CH<sub>2</sub>), 34.0 (C-5), 125.9 (C-3), 127.6 (C-2), 144.3 (C-4), 146.7 (C-1).

IR (ATR, cm<sup>-1</sup>): 3150, 3057, 3024, 2952, 1737, 1605, 1480, 1456, 1391, 1362, 1231, 1200, 871, 814, 780.

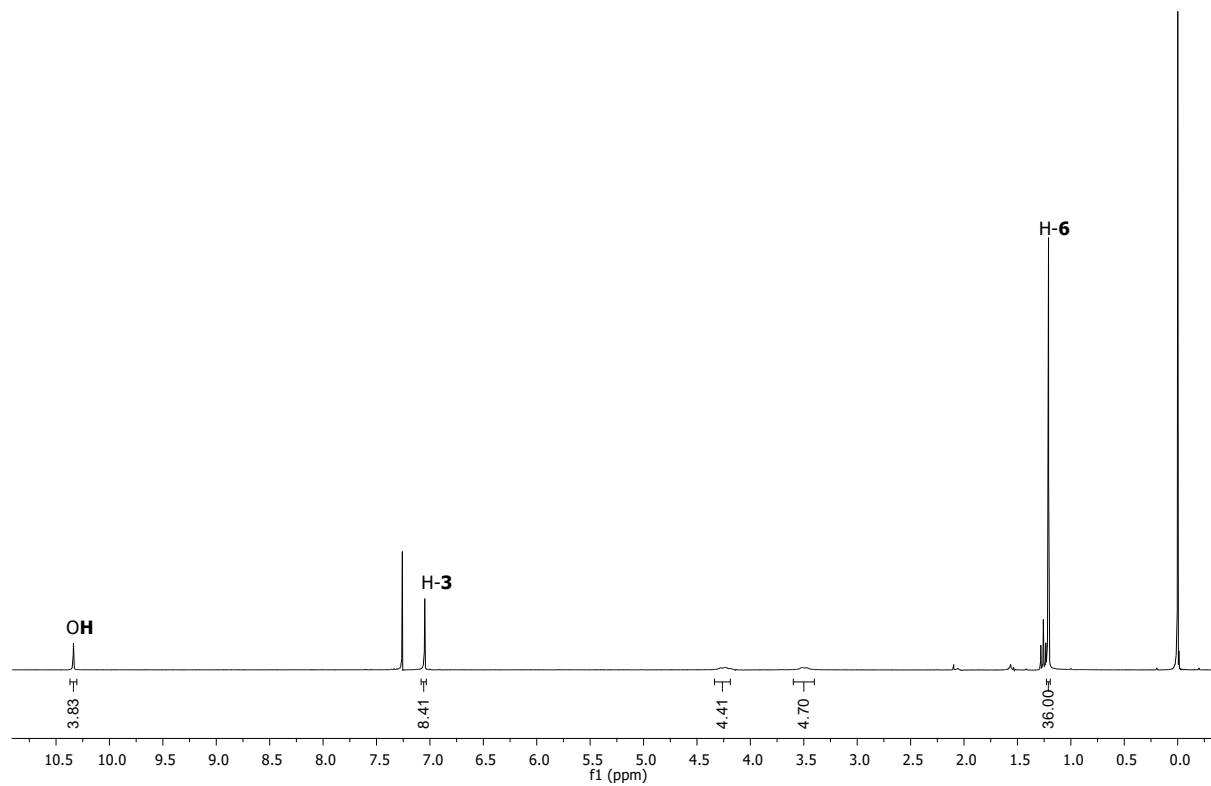

**Fig. S1.**  $^1\text{H}$  NMR spectrum (300 MHz;  $\text{CDCl}_3$ ) of the *p*-*tert*-butylcalix[4]arene.

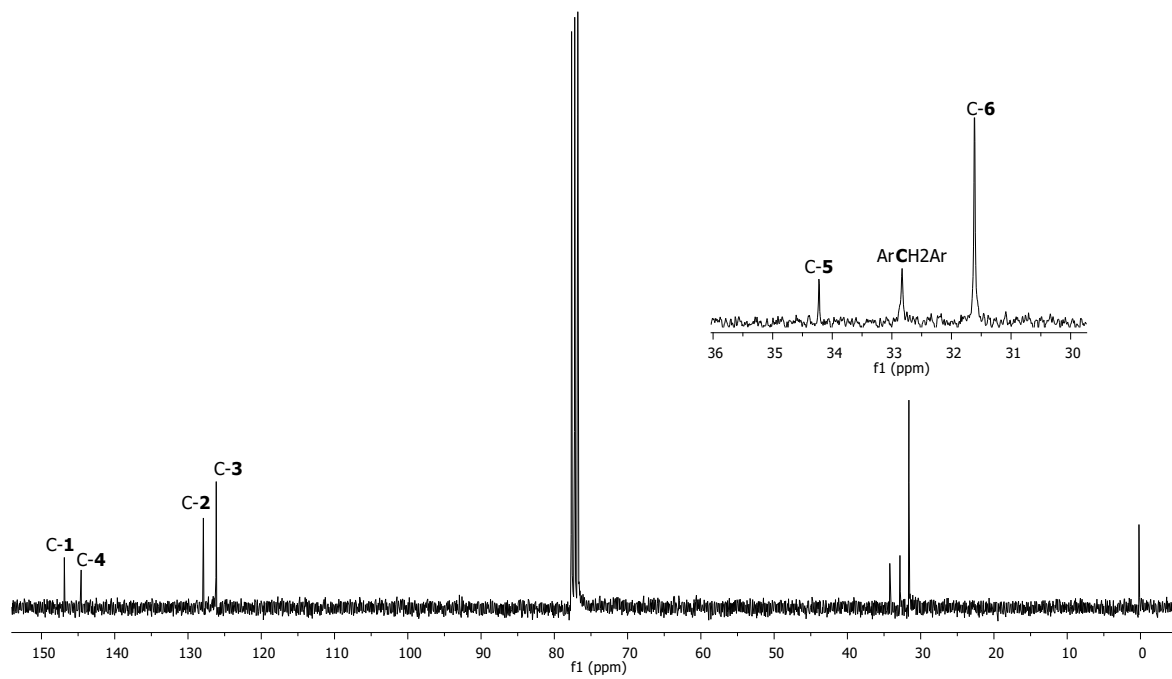

**Fig. S2.**  $^{13}\text{C}$  NMR spectrum (75 MHz;  $\text{CDCl}_3$ ) of the *p*-*tert*-butylcalix[4]arene.

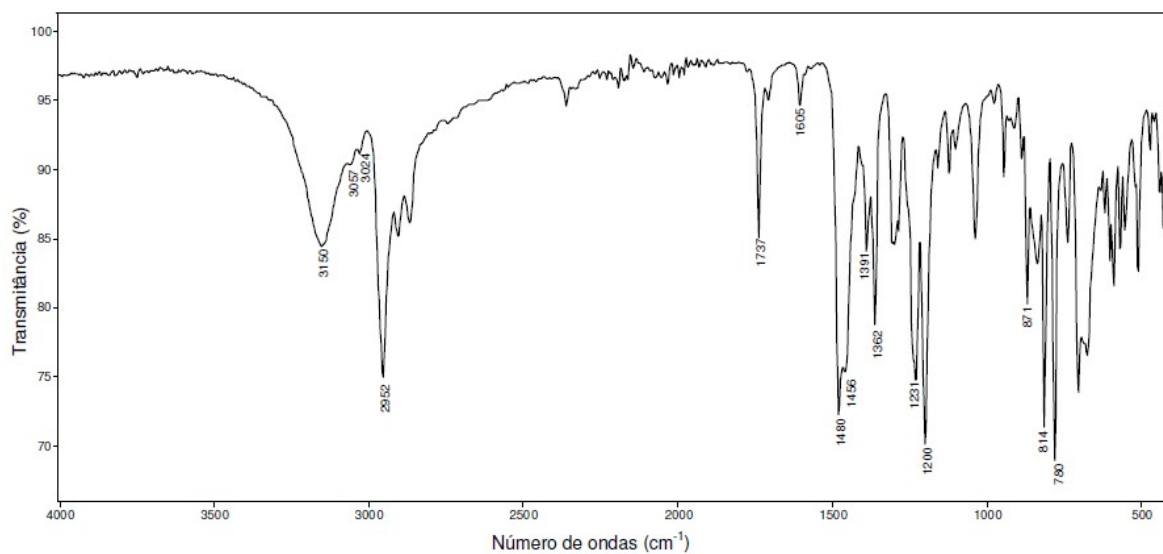

**Fig. S3.** *p*-*tert*-butylcalix[4]arene infrared spectrum.

## Synthesis of the calix[4]arene

The synthesis of calix[4]arene was carried out using *p*-*tert*-butylcalix[4]arene, phenol and aluminum chloride anhydrous in toluene following the methodology described by Gutsche et al.<sup>2</sup>. The system was kept under stirring and nitrogen atmosphere at room temperature for one hour (Scheme 2). The desired product, a white solid, was obtained in 81% yield after recrystallization in methanol-chloroform.

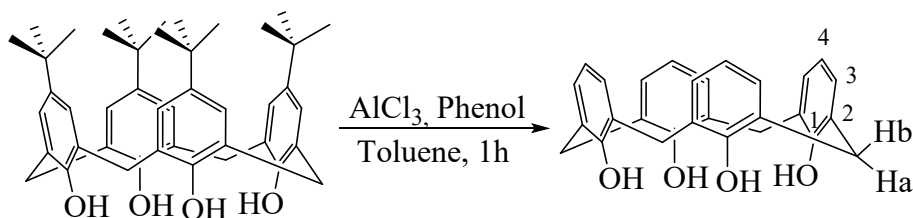

**Scheme 2** Reaction for obtaining the calix[4]arene.

$^1\text{H NMR}$  (300 MHz,  $\text{CDCl}_3$ ): 3.56 (d, 4H,  $J = 12.6$ , H-a), 4.27 (d, 4H,  $J = 12.6$ , H-b), 6.79 (t, 4H,  $J = 7.5$ , H-4), 7.08 (d, 8H,  $J = 7.5$  Hz, H-3), 10.23 (s, 4H, OH).

$^{13}\text{C NMR}$  (75 MHz;  $\text{CDCl}_3$ ): 31.9 ( $\text{CH}_2$ ), 122.5 (C-4), 128.5 (C-2), 129.2 (C-3), 149.0 (C-1).

**IR** (ATR,  $\text{cm}^{-1}$ ): 3152, 3092, 2935, 1593, 1466, 1447, 1410, 1369, 1238, 774, 749.

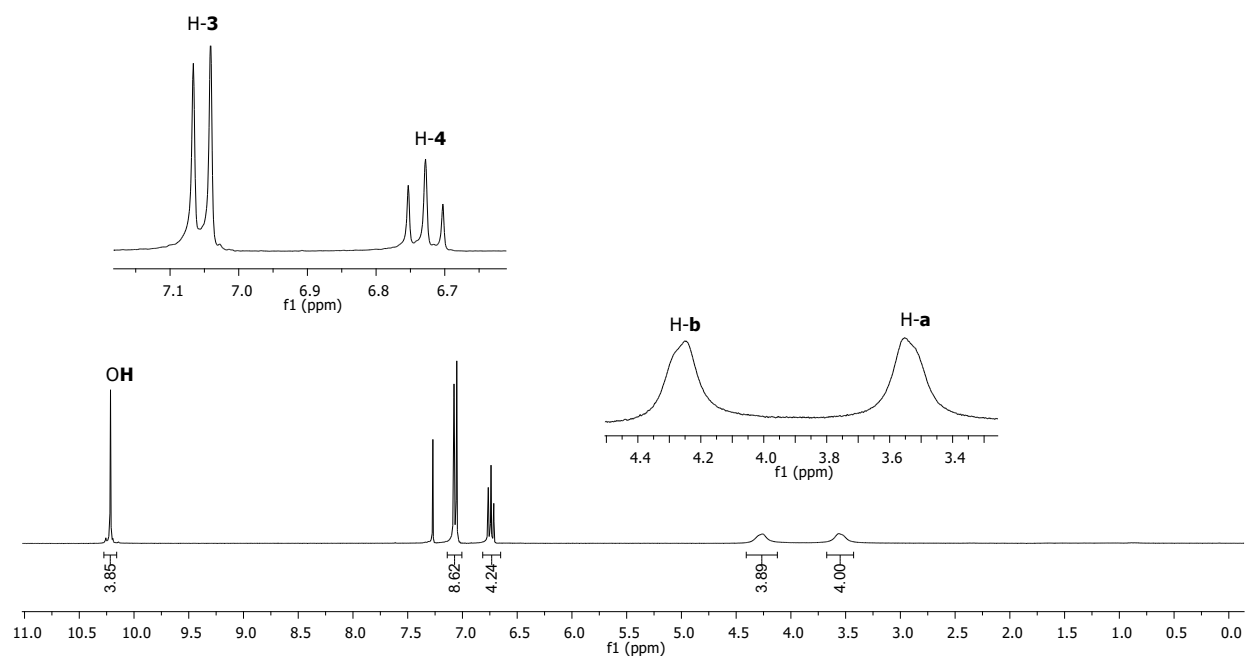

**Fig. S4.**  $^1\text{H}$  NMR spectrum (300 MHz;  $\text{CDCl}_3$ ) of the calix[4]arene.

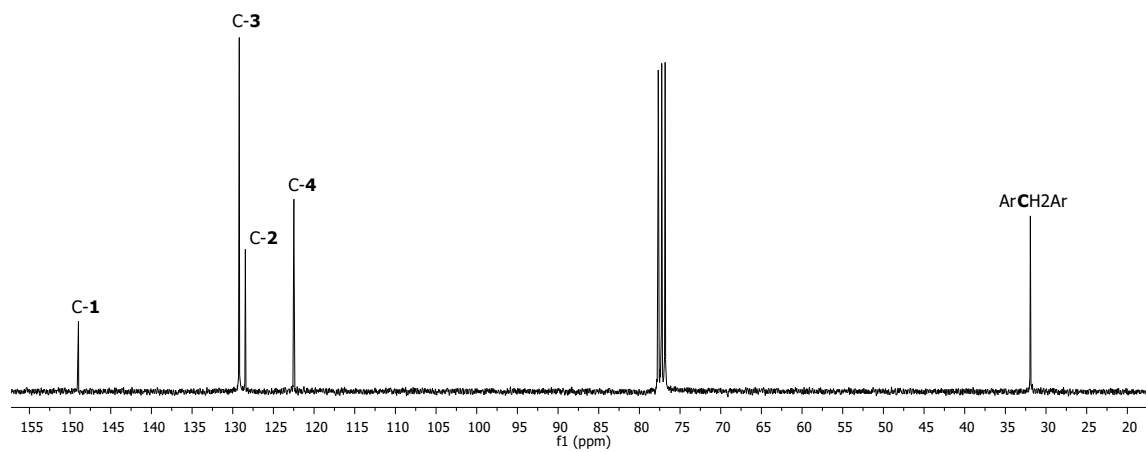

**Fig. S5.**  $^{13}\text{C}$  NMR spectrum (75 MHz;  $\text{CDCl}_3$ ) of the calix[4]arene.

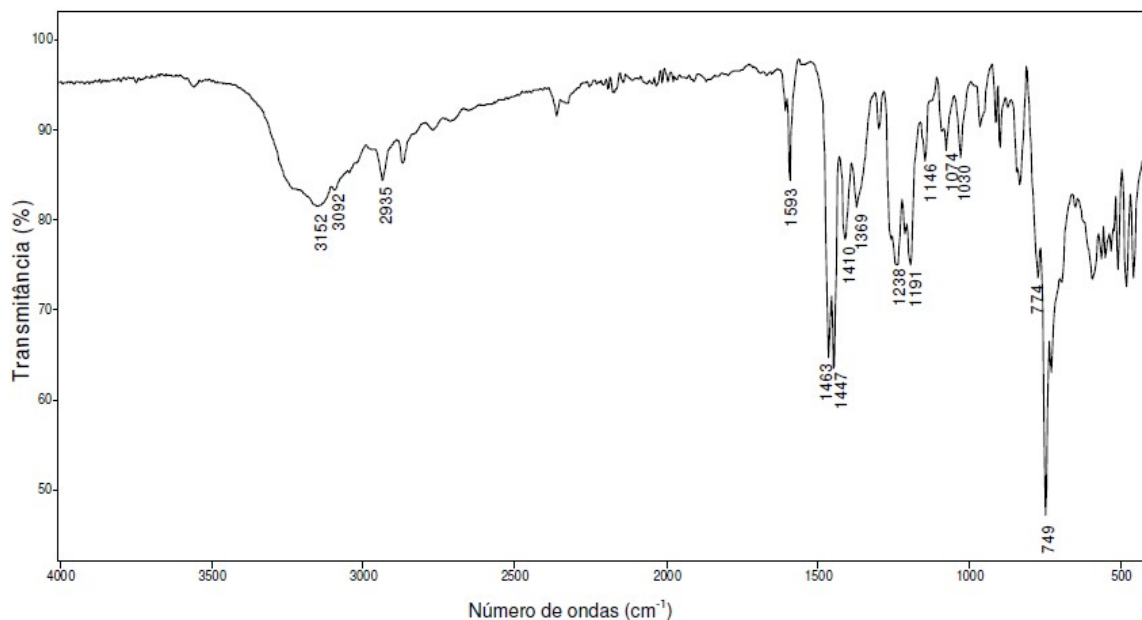

**Fig. S6.** calix[4]arene infrared spectrum.

### Synthesis of the *p*-sulfonic acid calix[4]arene (CX4SO<sub>3</sub>H)

Catalyst *p*-sulfonic acid calix[4]arene was conducted from calix[4]arene in the presence of concentrated sulfuric acid and heated for four hours as described by Gutsche et al<sup>3</sup> (Scheme 3).

The product was obtained in 75% yield as a solid white.

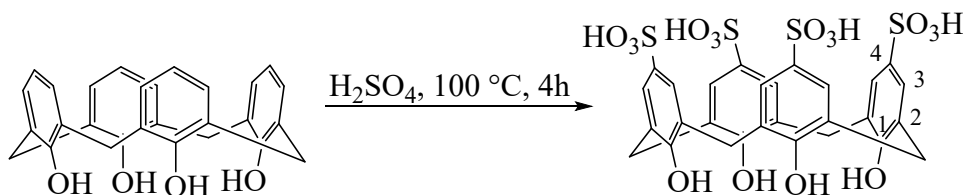

**Scheme 3** Reaction for obtaining of the *p*-sulfonic acid calix[4]arene (CX4SO<sub>3</sub>H).

<sup>1</sup>H NMR (300 MHz, D<sub>2</sub>O): 3.84 (s, 8H, CH<sub>2</sub>), 7.39 (s, 8H, H-3).

<sup>13</sup>C NMR (75 MHz, D<sub>2</sub>O): 30.7 (CH<sub>2</sub>), 126.6 (C-3), 128.2 (C-2), 135.8 (C-4), 151.9 (C-1).

IR (ATR, cm<sup>-1</sup>): 3182, 1705, 1636, 1599, 1455, 1147, 1117, 623.



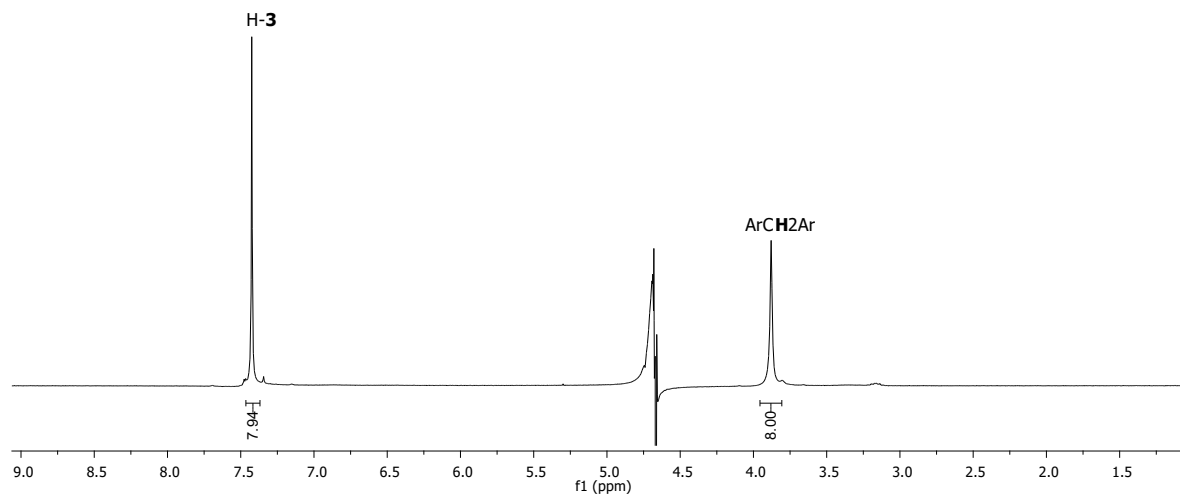

**Fig. S7.**  $^1\text{H}$  NMR spectrum (300 MHz;  $\text{D}_2\text{O}$ ) of the *p*-sulfonic acid calix[4]arene ( $\text{CX}_4\text{SO}_3\text{H}$ ).

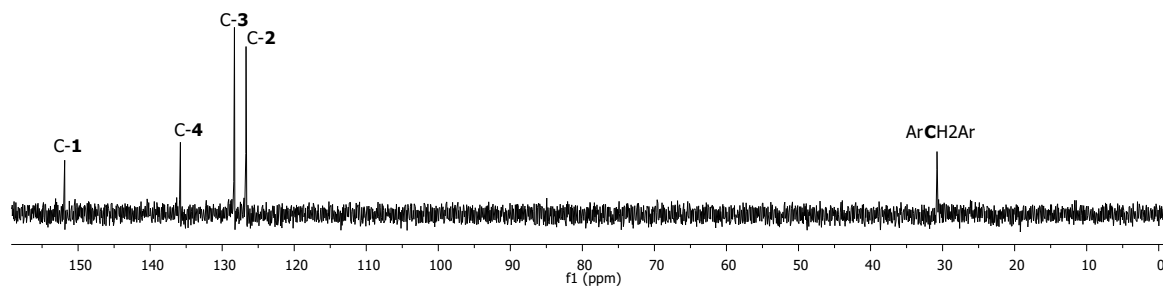

**Fig. S8.**  $^{13}\text{C}$  NMR spectrum (75 MHz;  $\text{D}_2\text{O}$ ) of the *p*-sulfonic acid calix[4]arene ( $\text{CX}_4\text{SO}_3\text{H}$ ).

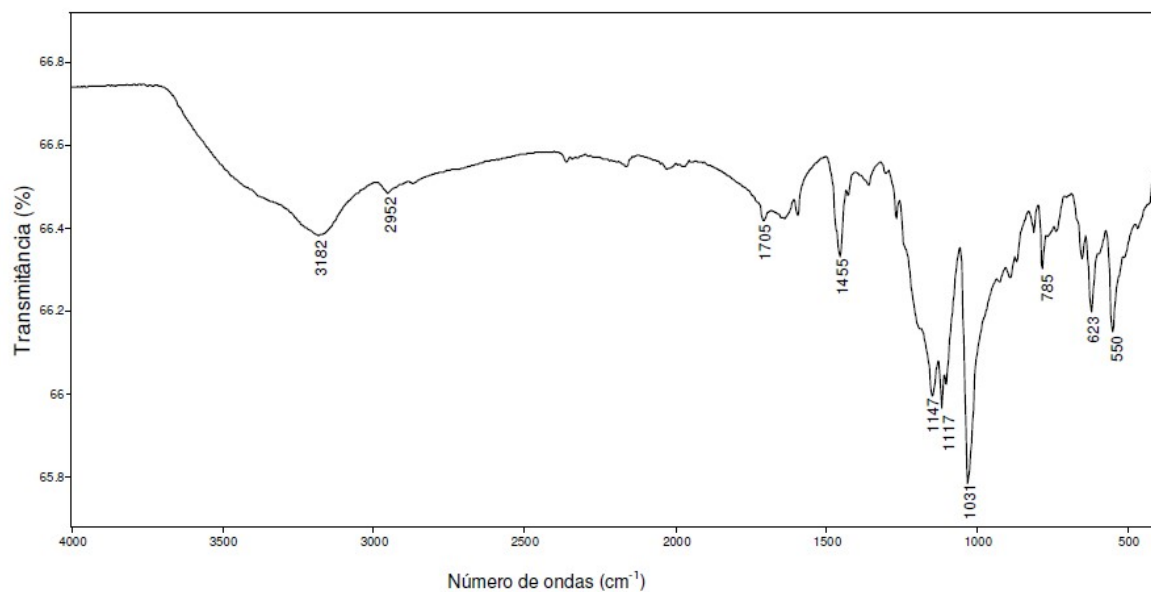

**Fig. S9.** *p*-Sulfonic acid calix[4]arene (CX<sub>4</sub>SO<sub>3</sub>H) infrared spectrum.

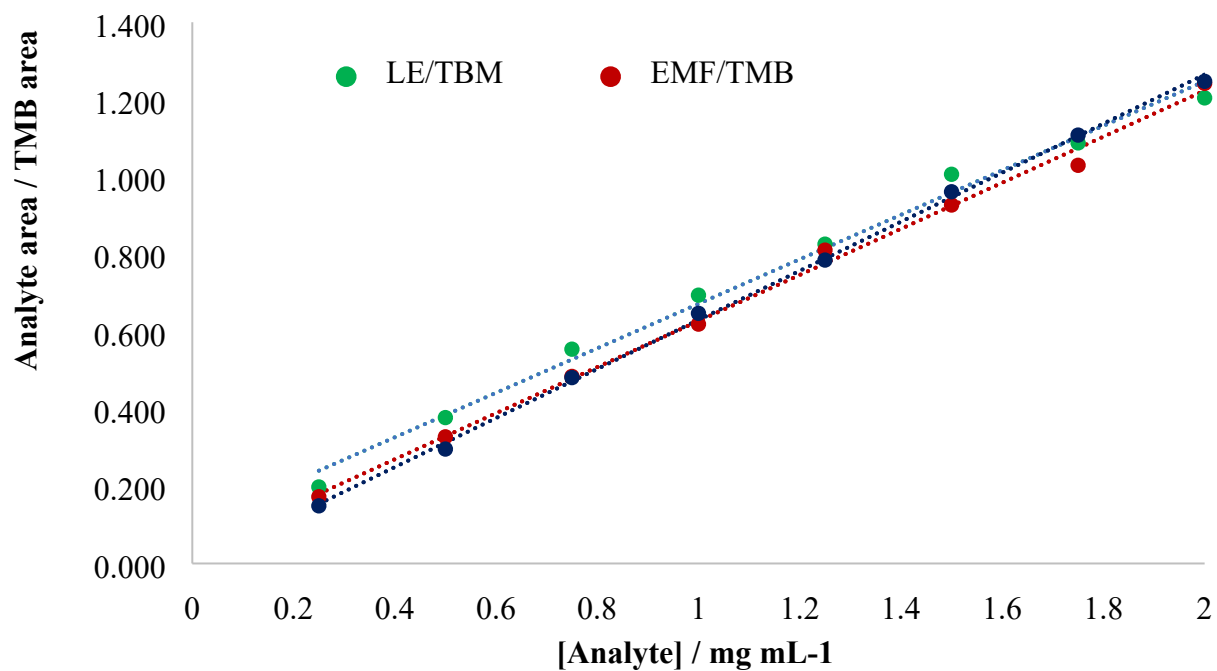

**Fig. S10** calibration curves for LE, EMF and HMF with internal standard (TMB) in ethyl acetate.

### 5-Ethoxymethylfurfural (EMF) and 5-hydroxymethylfurfural (HMF)

An experiment was set up to produce the EMF and HMF for the construction of the calibration curve. 0.25 mmol of fructose, 1 mol% of CX4SO<sub>3</sub>H and 1.00 mL of ethanol were added in a reaction vessel (Scheme 4). The mixture was taken to a microwave reactor and heated to 140 °C for 15 min. A mixture of EMF and HMF was obtained, which were isolated by silica gel column chromatography, using dichloromethane/diethyl ether (1:1) as the mobile phase.

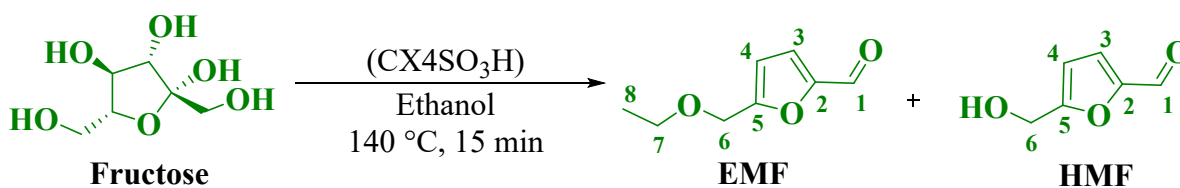

**Scheme 4** Synthesis of EMF and HMF.

#### EMF:

<sup>1</sup>H NMR (300 MHz, CDCl<sub>3</sub>): 1.23 (t, *J* = 7.0 Hz, 3H, H-8), 3.79 (q, *J* = 7.0 Hz, 2H, H-7), 4.52 (s, 2H, H-6), 6.51 (d, *J* = 3.5 Hz, 1H, H-4), 7.20 (d, *J* = 3.5 Hz, 1H, H-3), 9.61 (s, 1H, HC=O).

<sup>13</sup>C NMR (75 MHz, CDCl<sub>3</sub>): 15.0 (C-8), 64.8 (C-6), 66.6 (C-7), 111.0 (C-4), 122.0 (C-3), 153.0 (C-2), 158.8 (C-5), 177.7 (C-1).

GC/MS *m/z* (abundance %): 154 (20, M<sup>+</sup>), 125 (100), 109 (90), 97 (95), 81 (40), 69 (30), 53 (35), 41 (30).

IR (ATR, cm<sup>-1</sup>): 2972, 2866, 1673, 1520, 1186, 1095, 1019, 803.

**HMF:**

**<sup>1</sup>H NMR** (CDCl<sub>3</sub>, 300 MHz) 4.68 (s, 2H, H-6), 6.49 (d, *J* = 3.6 Hz, 1H, H-4), 7.20 (d, *J* = 3.6 Hz, 1H, H-3), 9.53 (s, 1H, HC=O).

**<sup>13</sup>C NMR** (CDCl<sub>3</sub>, 75 MHz)  $\delta$  57.5 (C-6), 109.9 (C-4), 123.0 (C-3), 152.3 (C-2), 160.8 (C-5), 177.7 (C-1).

**GC-MS** *m/z* (abundance %): 126 (55, M<sup>+</sup>), 97 (100), 69 (35), 41 (65).

**IR** (ATR, cm<sup>-1</sup>): 3336, 2837, 1659, 1513, 1395, 1186, 1111, 764.

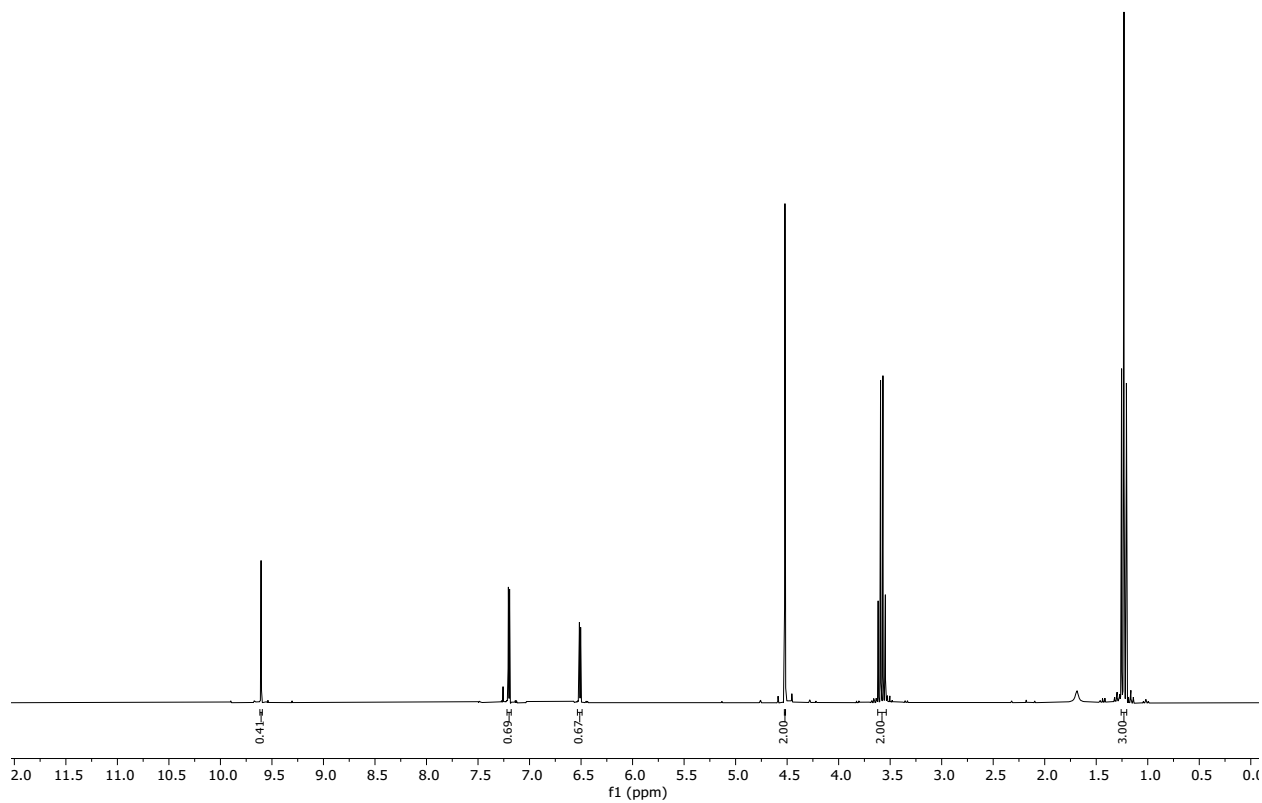

**Fig. S11** <sup>1</sup>H NMR (300 MHz; CDCl<sub>3</sub>) of EMF.

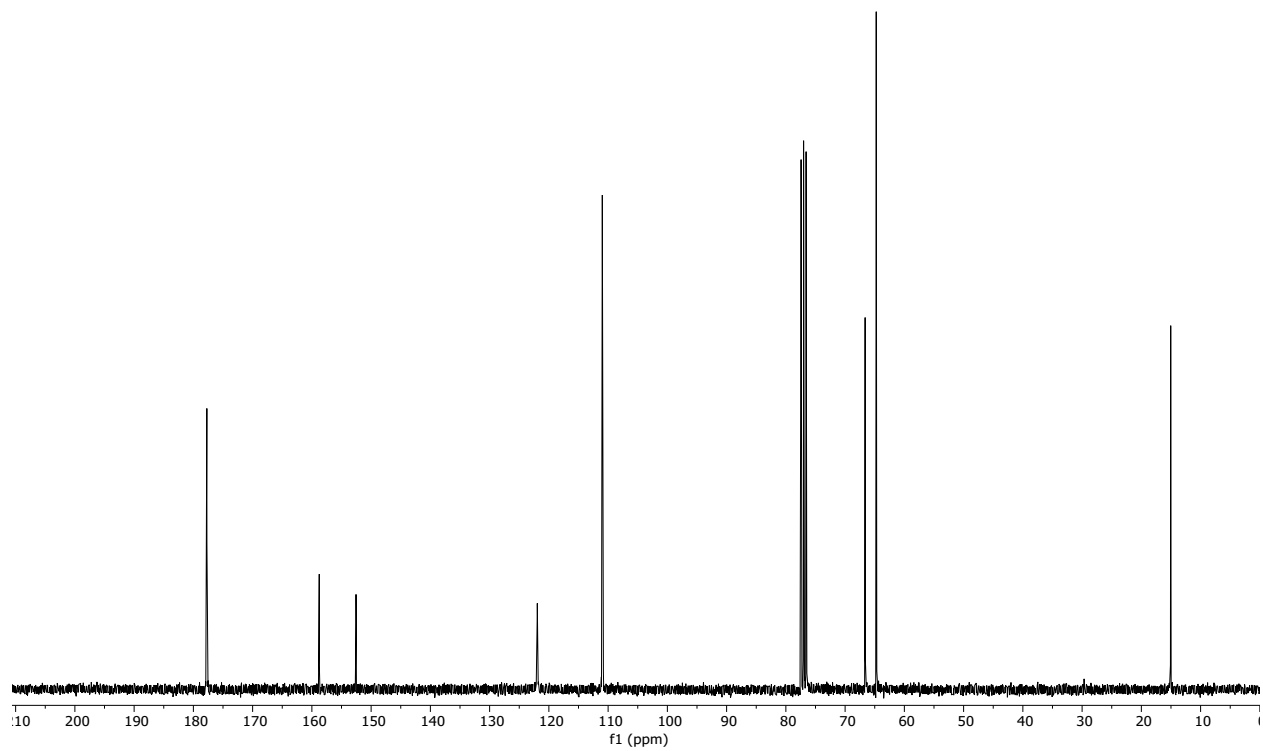

**Fig. S12**  $^{13}\text{C}$  NMR (75 MHz;  $\text{CDCl}_3$ ) of EMF.

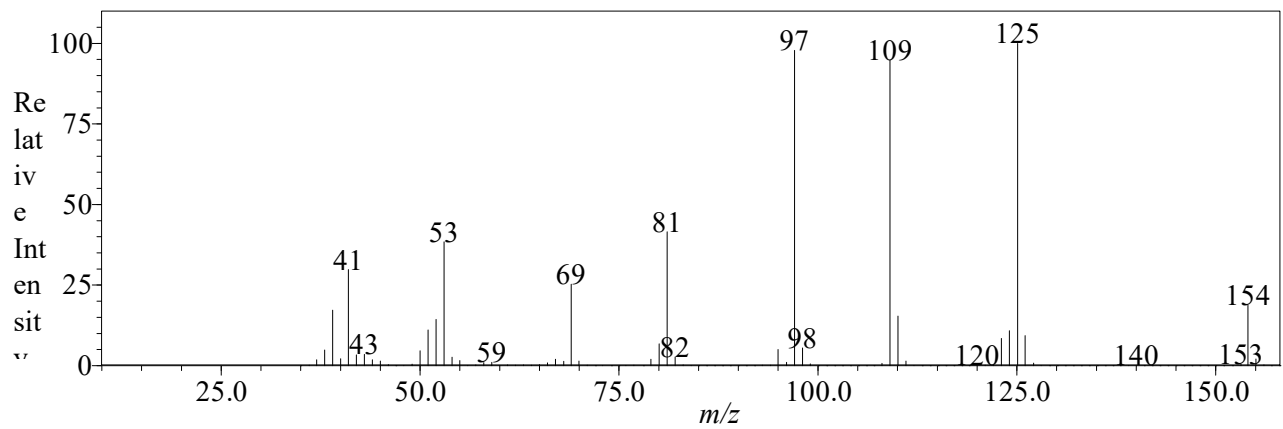

**Fig. S13** EMF mass spectrum.

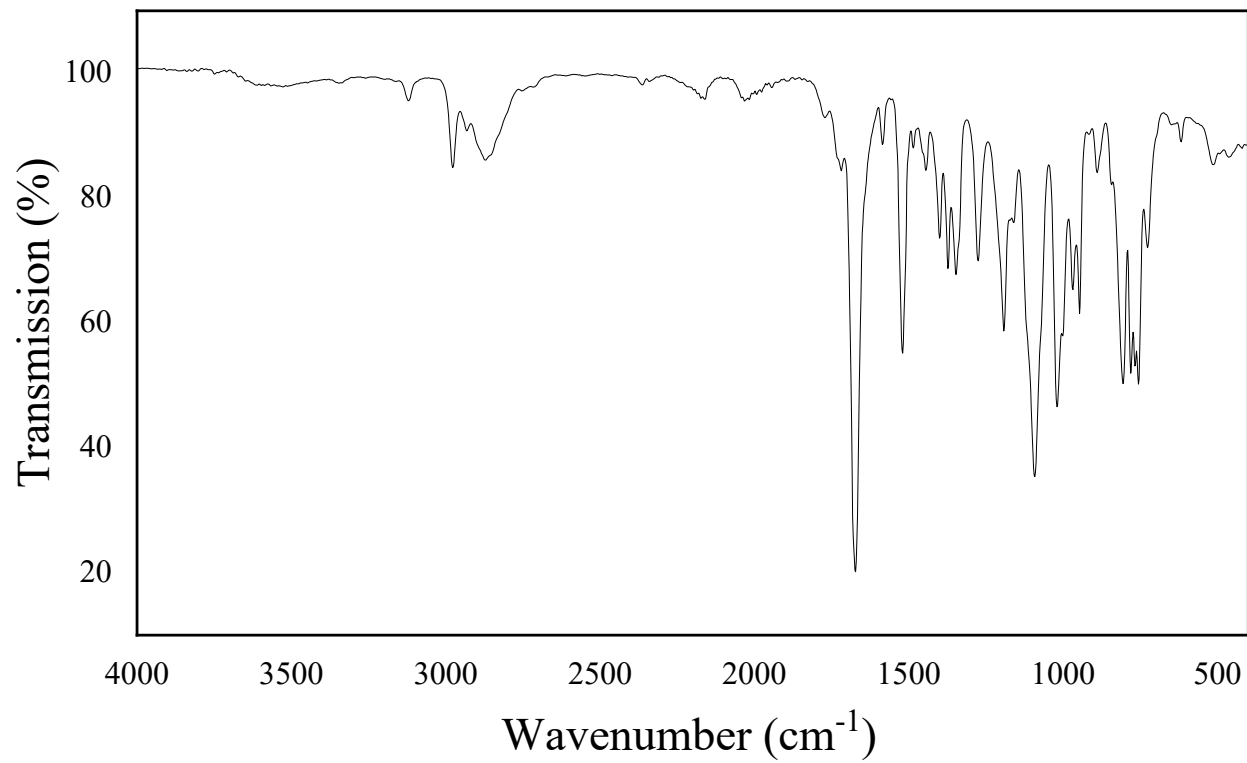

**Fig. S14** EMF infrared spectrum.

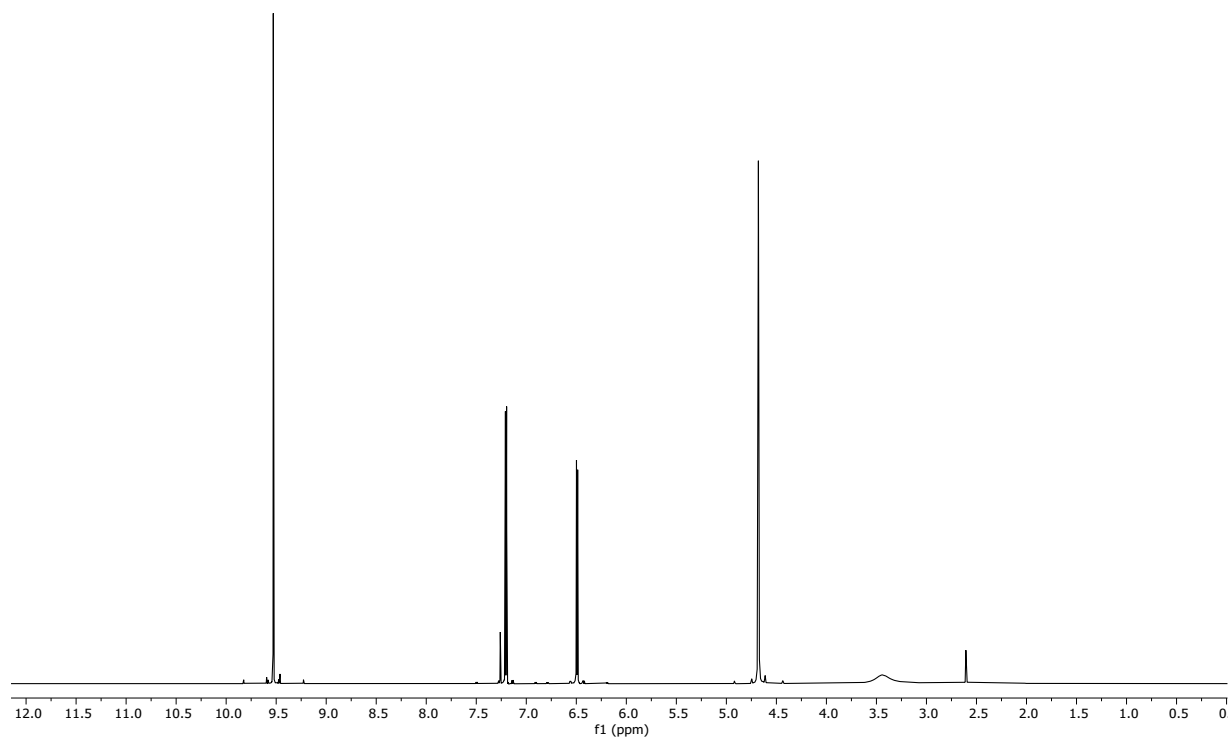

**Fig. S15**  $^1\text{H}$  NMR (300 MHz;  $\text{CDCl}_3$ ) of 5-hydroxymethylfurfural.

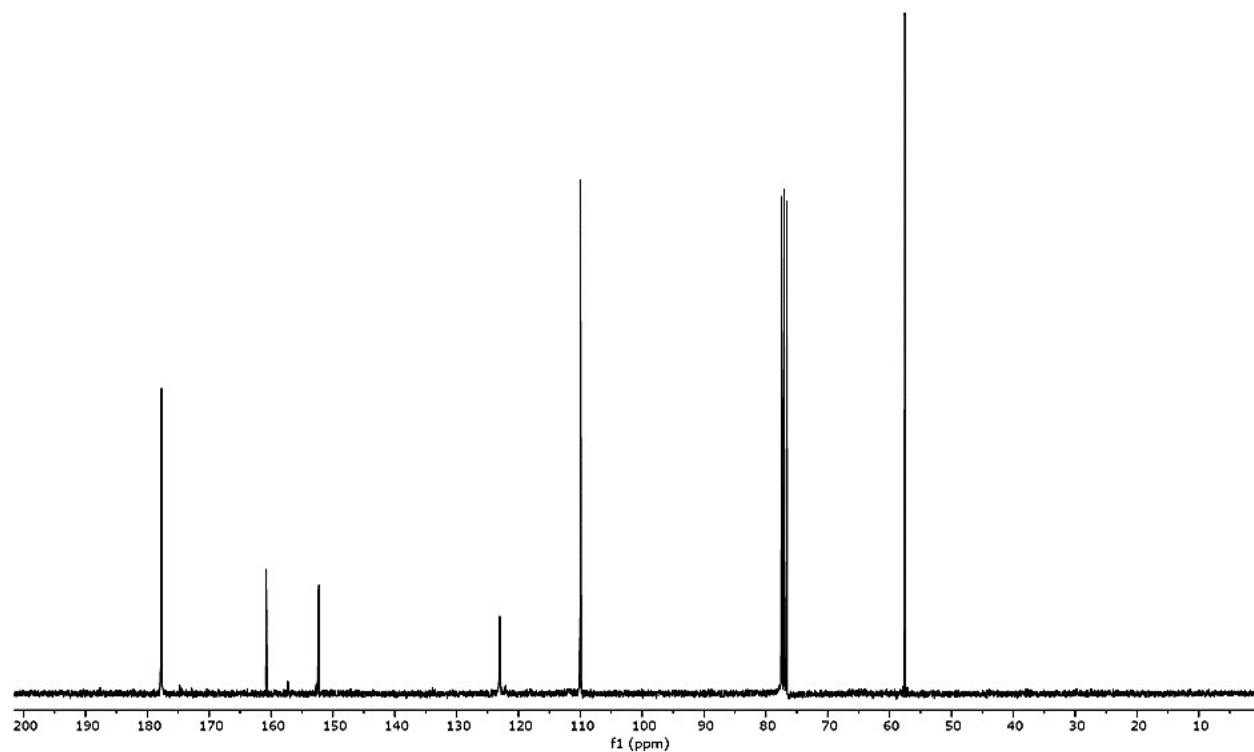

**Fig. S16**  $^{13}\text{C}$  NMR (75 MHz;  $\text{CDCl}_3$ ) of 5-hydroxymethylfurfural.

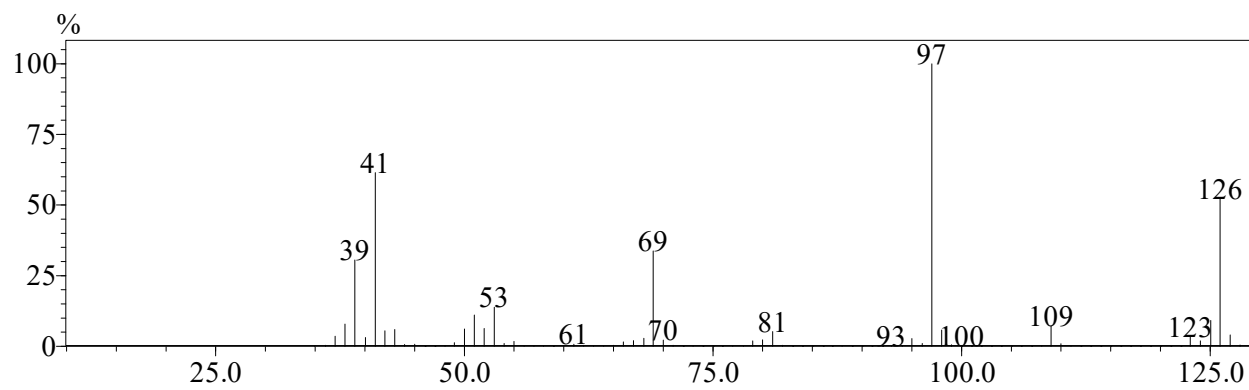

**Fig. S17** 5-hydroxymethylfurfural mass spectrum.

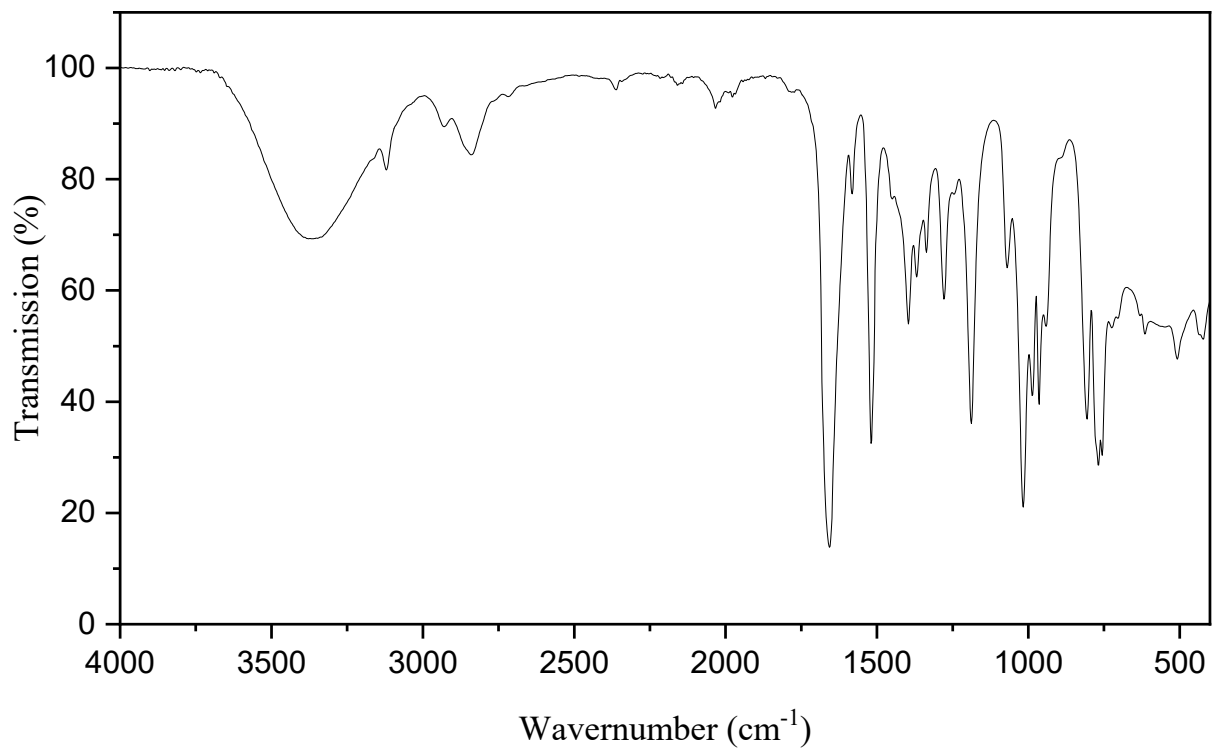

**Fig. S18** 5-hydroxymethylfurfural infrared spectrum.



## Ethy Levulinate (EL)

An experiment to synthesize EL was set up according to the methodology already reported in the literature by Castro et al <sup>4</sup> (Scheme 5), in order to obtain the ester to build the calibration curve.

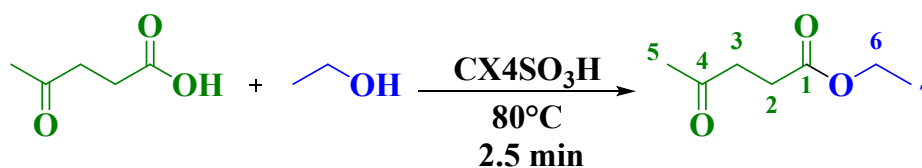

**Scheme 5** Synthesis of EL.

$^1\text{H NMR}$  (300 MHz,  $\text{CDCl}_3$ ): 1.24 (t,  $J = 7.1$  Hz, 3H, H-7), 2.18 (s, 3H, H-5), 2.56 (t,  $J = 7.0$  Hz, 2H, H-3), 2.74 (t,  $J = 7.0$  Hz, 2H, H-2), 4.12 (q,  $J = 7.1$  Hz, 2H, H-6).

$^{13}\text{C NMR}$  (75 MHz,  $\text{CDCl}_3$ ): 14.1 (C-7), 28.0 (C-2), 29.9 (C-5), 37.9 (C-3), 60.6 (C-6), 172.7 (C-4), 206.7 (C-1).

**GC/MS**  $m/z$  (abundance %): 144 (4,  $\text{M}^+$ ), 129 (21), 99 (71), 43 (100).

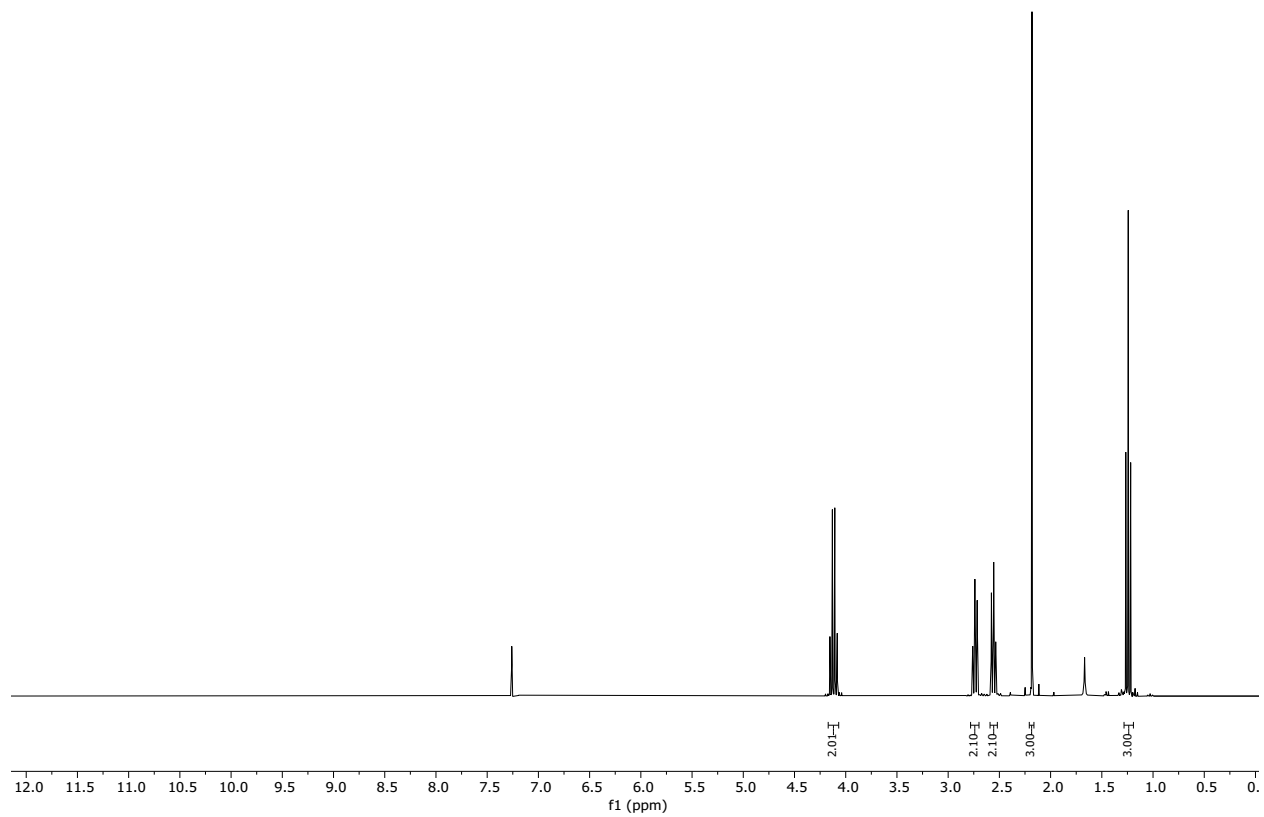

**Fig. S19** <sup>1</sup>H NMR (300 MHz; CDCl<sub>3</sub>) of EL.

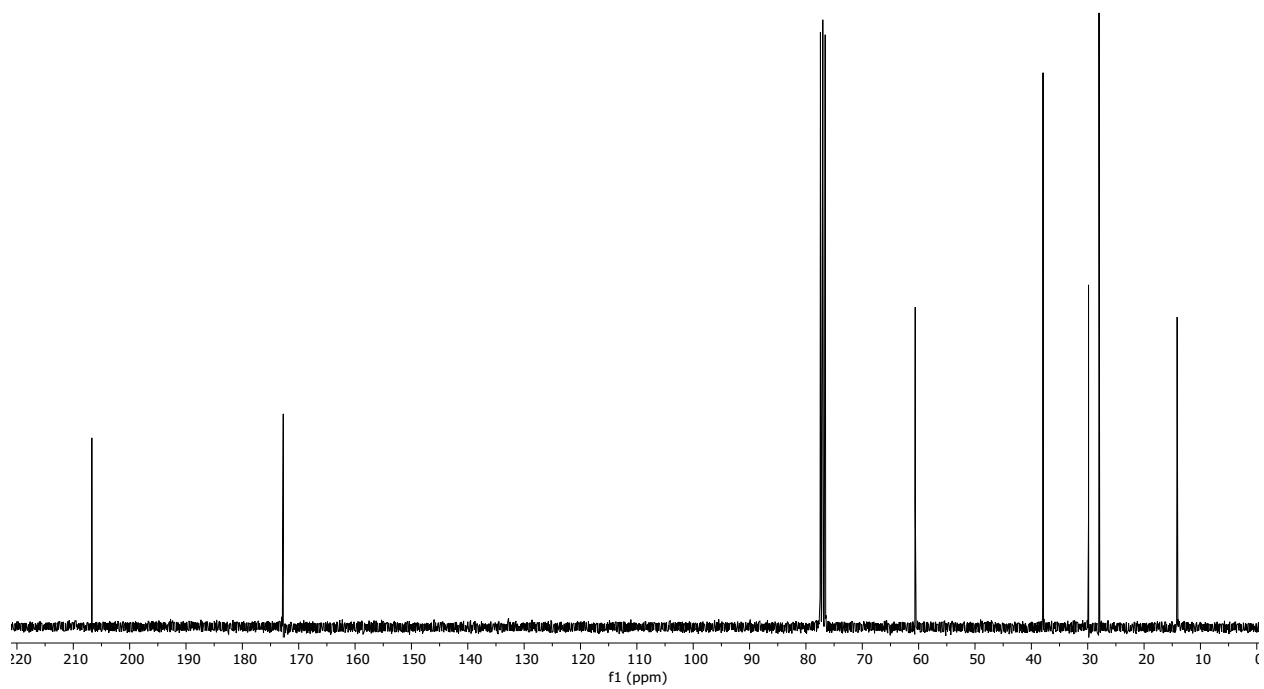

**Fig. S20** <sup>13</sup>C NMR (75 MHz; CDCl<sub>3</sub>) of EL.

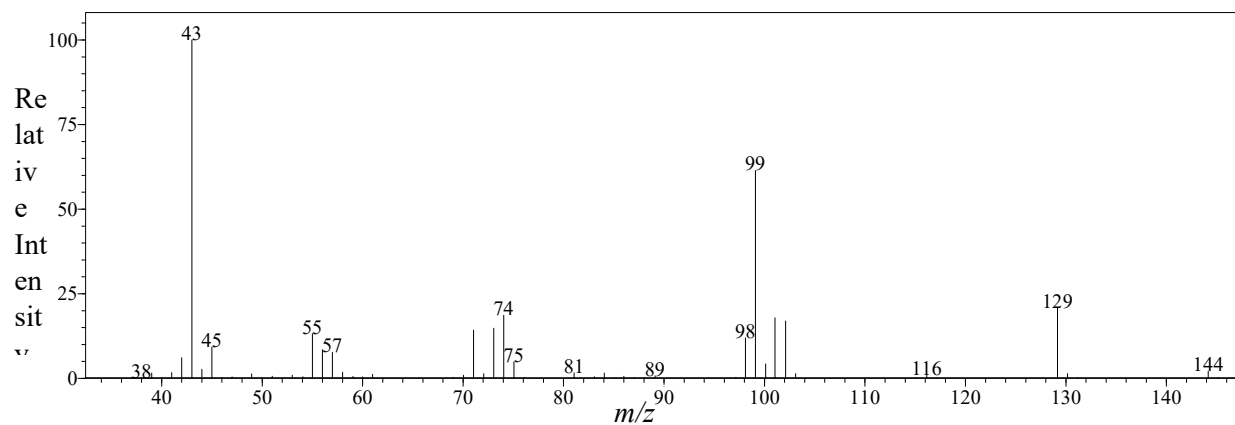

**Fig. S21** EL mass spectrum.

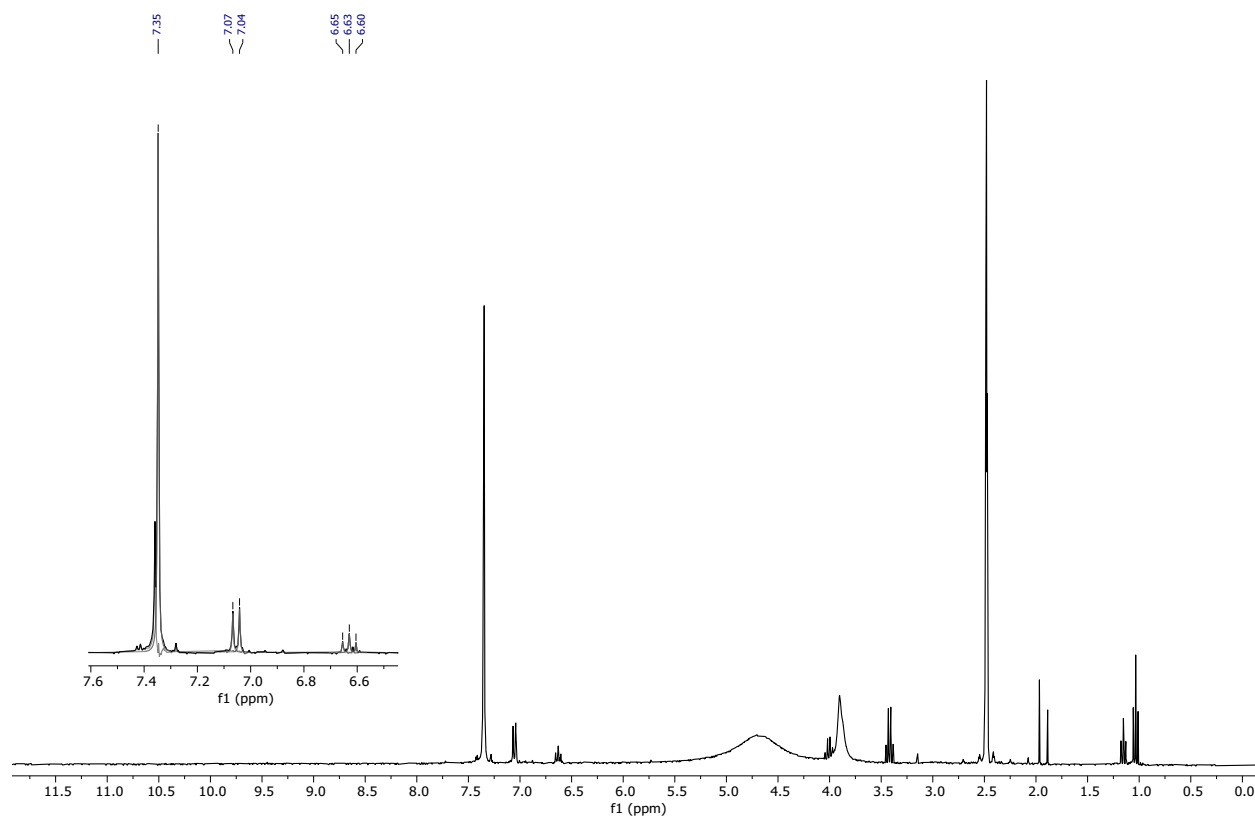

**Fig. S22**  $^1\text{H}$  NMR (300 MHz;  $\text{DMSO-}d_6$ ) of  $\text{CX}_4\text{SO}_3\text{H}$  catalyst recovered after reaction.

## Fructose conversion under optimal conditions

After determining the optimal conditions for converting fructose to EMF (140 °C, 20 min, 1.0 mol% CX4SO<sub>3</sub>H), an experiment was carried out to determine the conversion of fructose. For this, after an experiment under optimized conditions, the entire reaction mixture was transferred to a 5 mL flask, which had its volume measured with Milli-Q water. After homogenization of this solution, it was filtered through a 45 µm cellulose acetate filter. Then, an aliquot with a volume of 20 µL was injected into a high performance liquid chromatography system with a refractive index detector (HPLC-RI), using a Thermo Scientific Accela LC liquid chromatograph (refractive index (RI) detector, auto-injector and Accela pump) (Thermo Fischer Scientific, TX, USA). The method used had the following specifications: column Rezex RFQ-Fast Acid H<sup>+</sup> (8%) (100 x 7.8 mm), mobile phase H<sub>2</sub>SO<sub>4</sub> 5 mM, flow of 0.5 mL min<sup>-1</sup>, oven temperature of 60 °C. After analysis, it was found that 99% of the fructose was converted under optimal reaction conditions.

## References

- (1) Gutsche, C.; Iqbal, M. P-Tert-Buthylcalix[4]Arene. *Org Synth* **1990**, *68*, 234.
- (2) Casnati, A.; Ca', N. Della; Sansone, F.; Ugozzoli, F.; Ungaro, R. Enlarging the Size of Calix[4]Arene-Crowns-6 to Improve Cs<sup>+</sup>/K<sup>+</sup> Selectivity: A Theoretical and Experimental Study. *Tetrahedron* **2004**, *60* (36), 7869–7876. <https://doi.org/10.1016/j.tet.2004.06.058>.
- (3) Shinkai, S.; Mori, S.; Tsubaki, T.; Sone, T.; Manabe, O. New Syntheses of Calixarene-p-Sulphonates and p-Nitrocalixarenes. *J. CHEM. SOC. PERKIN TRANS.* **1987**, 2297–2299.
- (4) Castro, G. A. D.; Fernandes, S. A. Microwave-Assisted Green Synthesis of Levulinate

Esters as Biofuel Precursors Using Calix[4]Arene as an Organocatalyst under Solvent-Free Conditions. *Sustain. Energy Fuels* **2021**, 5 (1), 108–111.

<https://doi.org/10.1039/d0se01257b>.
